# Supplementary material for: Cell type‐selective pathways and clinical associations of lysophosphatidic acid biosynthesis and signaling in the ovarian cancer microenvironment
Source: PubMed Central journal article supplement (PMC6360368; doi:10.1002/1878-0261.12396), 2018-11-15
Supplement: MOL2-13-185-s001.pdf [file MOL2-13-185-s001.pdf]

## Supporting Figures

Reinartz et al.: Cell-type-selective pathways and clinical associations of lysophosphatidic acid biosynthesis and signaling in the ovarian cancer microenvironment

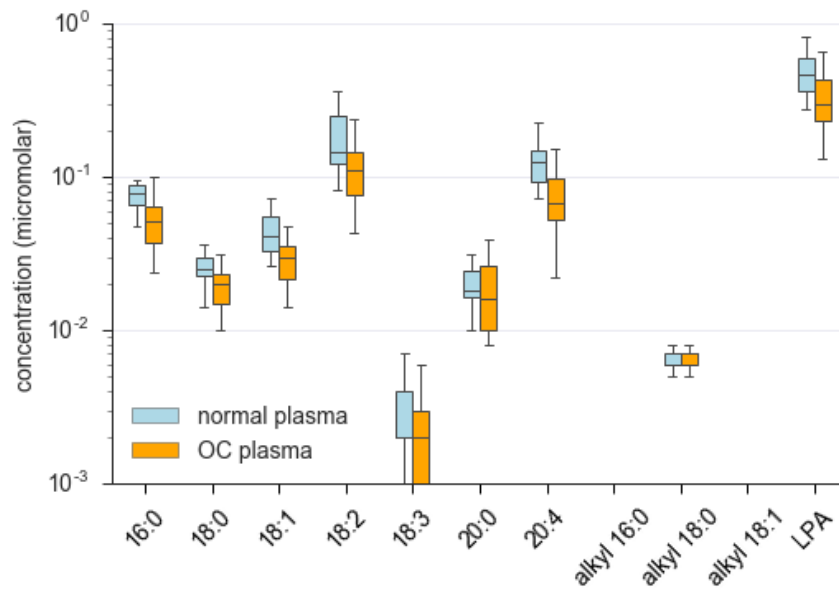

**Figure S1.**

Levels of LPA species in plasma samples from HGSC patients (n=19) and patients with non-malignant disease (ovarian cysts or myomatosis uteri; n=11). \*\*:  $p < 0.01$ , \*\*\*\*:  $p < 0.0001$  by paired t-test.

## Supporting Figures

Reinartz et al.: Cell-type-selective pathways and clinical associations of lysophosphatidic acid biosynthesis and signaling in the ovarian cancer microenvironment

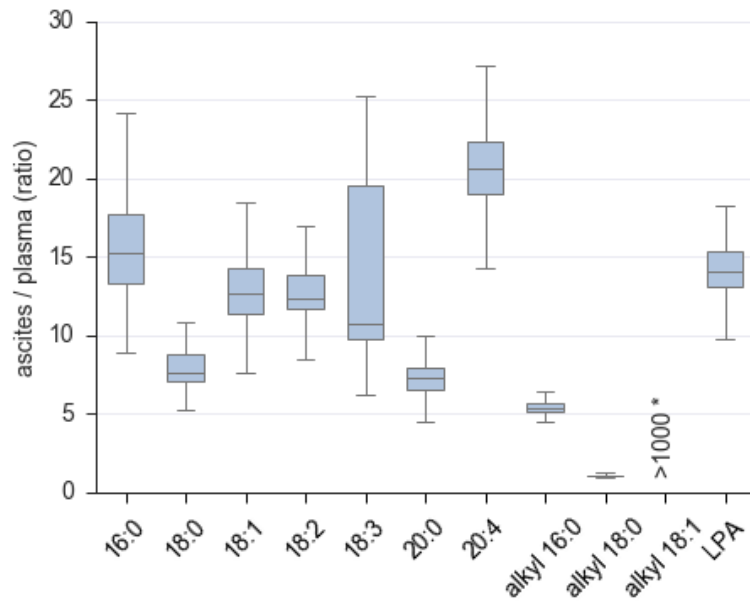

**Figure S2.**

Ratio of LPA levels in HGSC ascites (n=91) versus plasma (n=30). The graph shows the results of a bootstrapping analysis (1000 simulations): median of bootstrapping results (horizontal lines within boxes), upper and lower quartiles (box) and range (whiskers).

## Supporting Figures

Reinartz et al.: Cell-type-selective pathways and clinical associations of lysophosphatidic acid biosynthesis and signaling in the ovarian cancer microenvironment

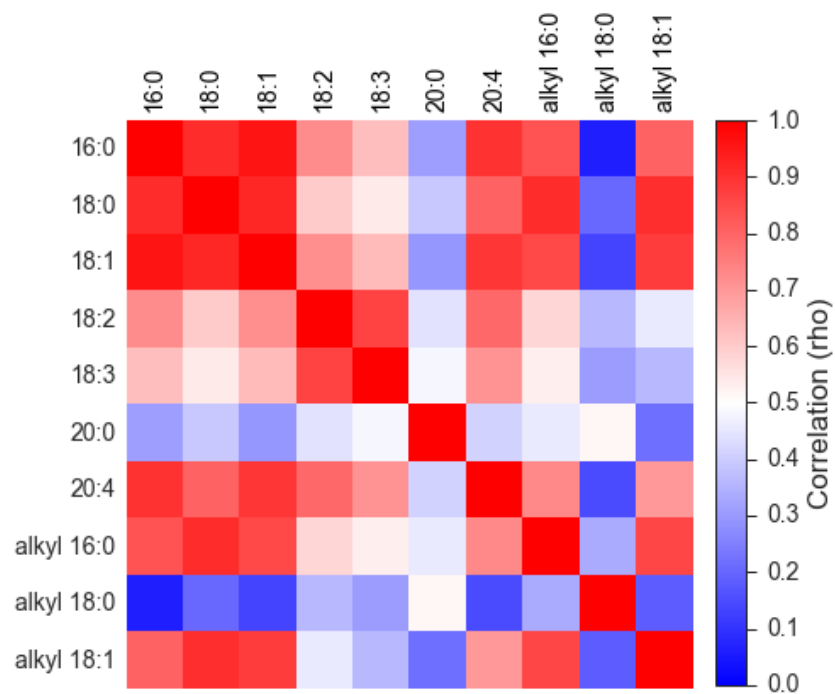

**Figure S3.**

Spearman correlation of the levels of acyl-LPA (16:0 ... 20:4) and alkyl-LPA species in ascites.

**Supporting Figures**

Reinartz et al.: Cell-type-selective pathways and clinical associations of lysophosphatidic acid biosynthesis and signaling in the ovarian cancer microenvironment

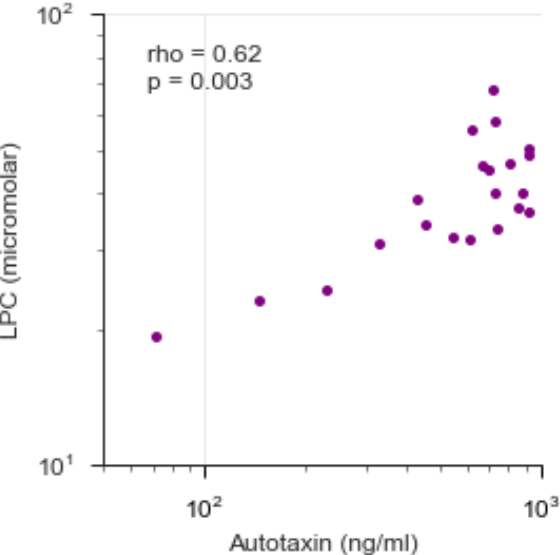

**Figure S4.**

Correlation of LPC and autotaxin levels in ascites. Rho: Spearman correlation coefficient.

## Supporting Figures

Reinartz et al.: Cell-type-selective pathways and clinical associations of lysophosphatidic acid biosynthesis and signaling in the ovarian cancer microenvironment

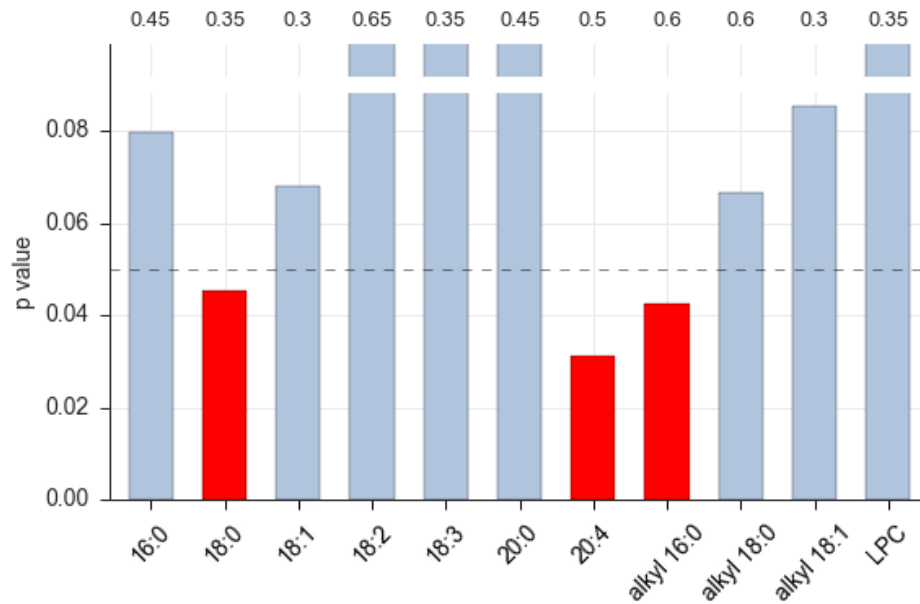

**Figure S5.**

Association of the levels of individual LPA species and LPC with the RFS of HGSC patients. Bars shows logrank test p values for splitting the data at the best fitting quantile (as indicated at the top). Red: significant inverse association (positive hazard ratio); light blue: non significant association.

## Supporting Figures

Reinartz et al.: Cell-type-selective pathways and clinical associations of lysophosphatidic acid biosynthesis and signaling in the ovarian cancer microenvironment

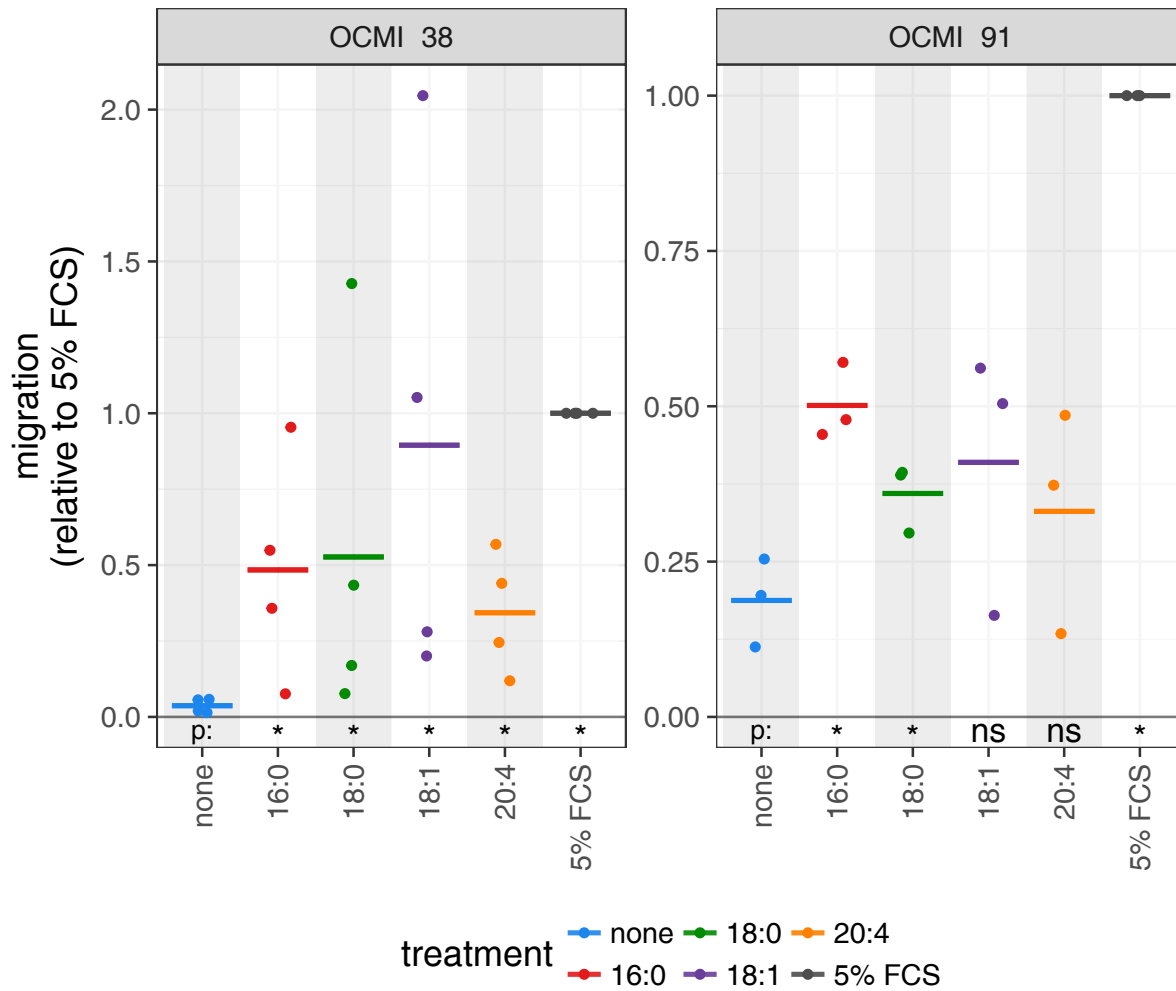

**Figure S6.**

Effect of LPA species on OC migration in a two-dimensional transwell assay as described in Experimental Procedures. Experimental details were as in Figure 5.
